# Supplementary material
Source: publisher figshare collection journal article supplement (https://springernature.figshare.com/ndownloader/files/12299102)

Memory Bandwidth (GB / s) with respect to the number of threads  
Speedup with respect to one thread on top of each bar

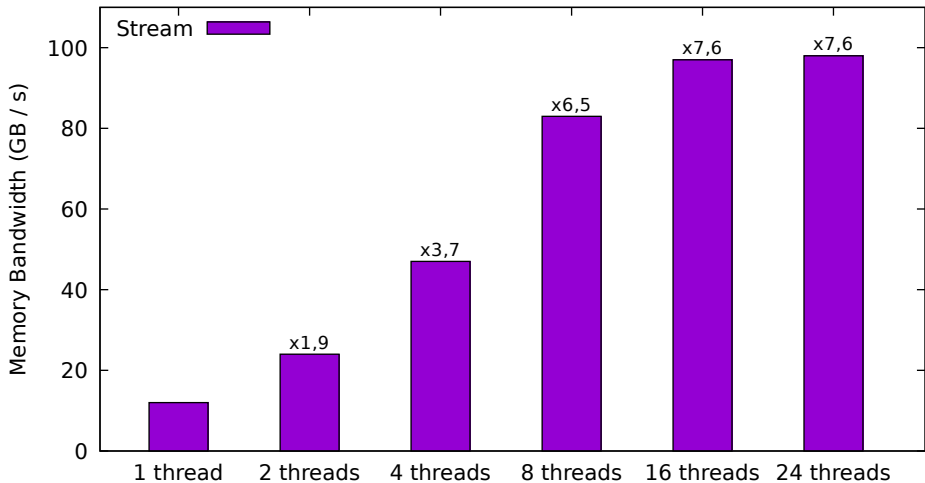

Supplement: Supplementary file 2 [file 12299102]
