# Supplementary material
Source: publisher figshare collection journal article supplement (https://springernature.figshare.com/ndownloader/files/12299102)

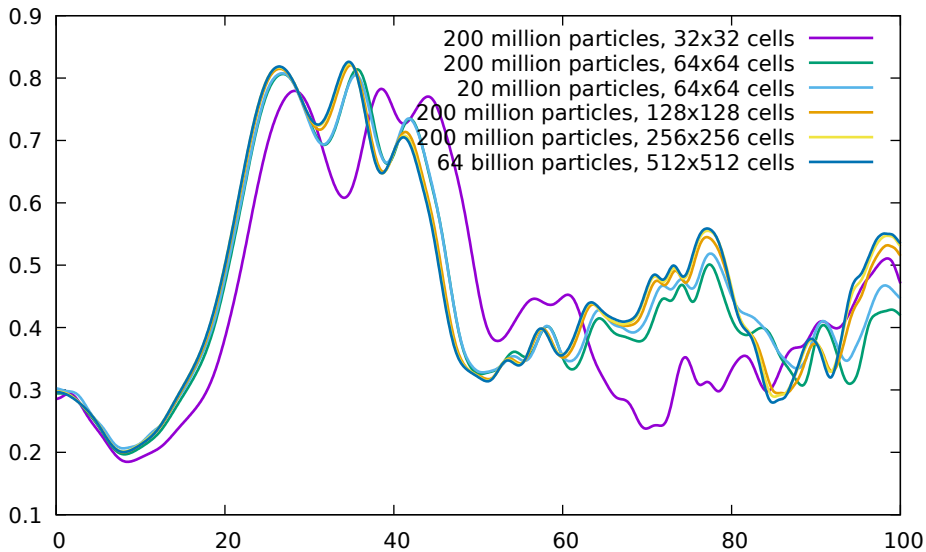

Supplement: Supplementary file 1 [file 12299102]
